# Supplementary material for: Enhanced cycling performance of bilayered vanadium oxide cathode in Li-ion batteries via dual metal-ion preintercalation
Source: Royal Society of Chemistry journal article supplement (doi:10.1039/d5ta00673b), 2025-01-01
Supplement: d5ta00673b1.pdf [file d5ta00673b1.pdf]

## Supporting Information

# Enhanced Cycling Performance of Bilayered Vanadium Oxide Cathode in Li-Ion Batteries via Dual Metal-Ion Preintercalation

Xinle Zhang <sup>†</sup>, Ekaterina Pomerantseva <sup>†\*</sup>

<sup>†</sup> *Department of Materials Science and Engineering, Drexel University, Philadelphia, PA 19104, USA*

\* *Corresponding Author: [ep423@drexel.edu](mailto:ep423@drexel.edu)*

**Keywords:** layered oxides; chemical preintercalation; annealing; cathodes; lithium-ion batteries.

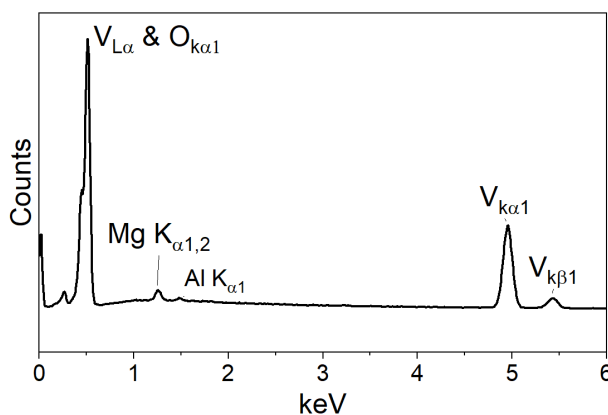

**Figure S1.** EDS spectra of LMVO showing the signal from vanadium, oxygen, and magnesium.

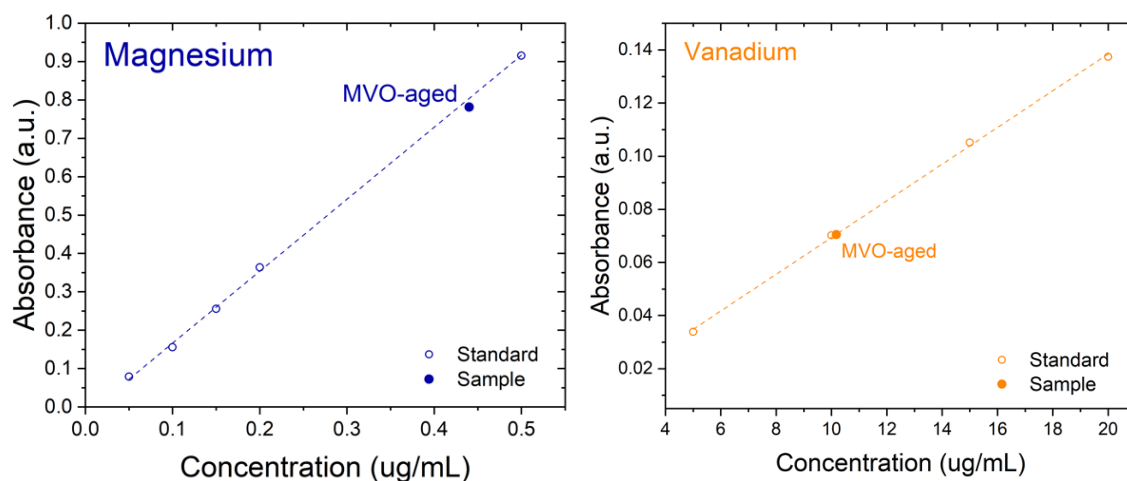

**Figure S2.** AAS calibration curve and absorbance values of Mg and V for MVO-aged precursor before hydrothermal treatment.

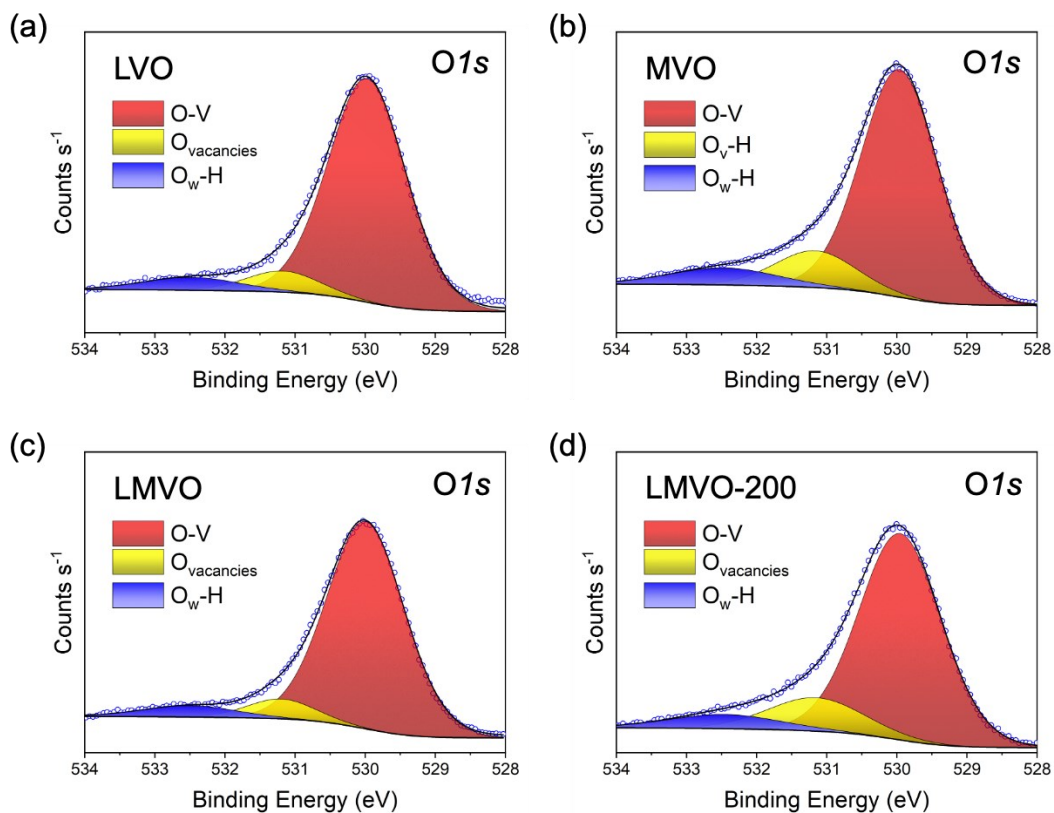

**Figure S3.** O1s region of XPS spectra of LVO, MVO, LMVO, and LMVO-200 demonstrating the signals from lattice oxygen, oxygen vacancies, and structural H<sub>2</sub>O.

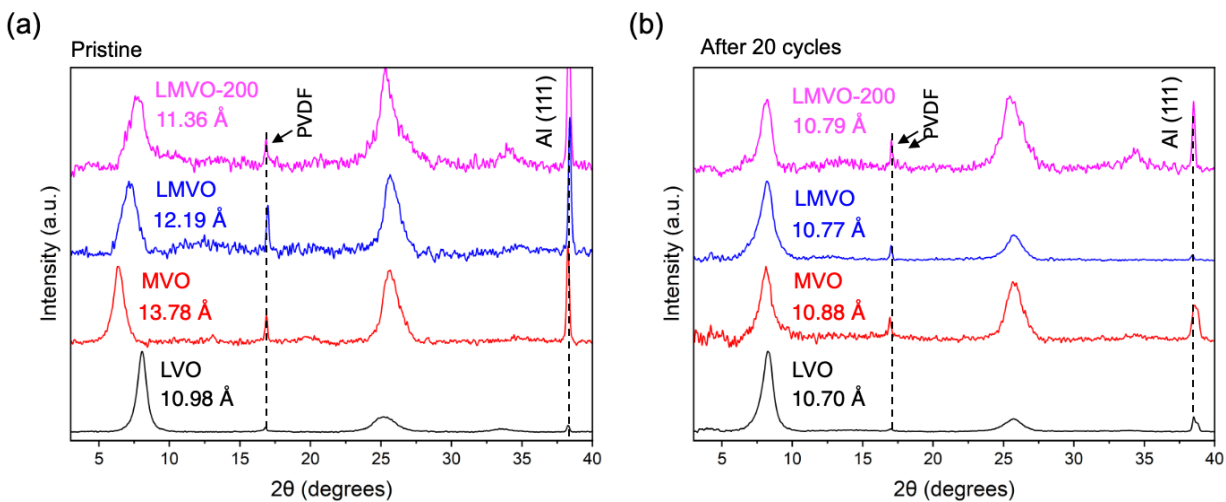

**Figure S4.** Ex-situ XRD analysis of (a) pristine electrodes (b) electrodes after being galvanostatically cycled in lithium-ion cells for 20 cycles at 20 mA g<sup>-1</sup>.

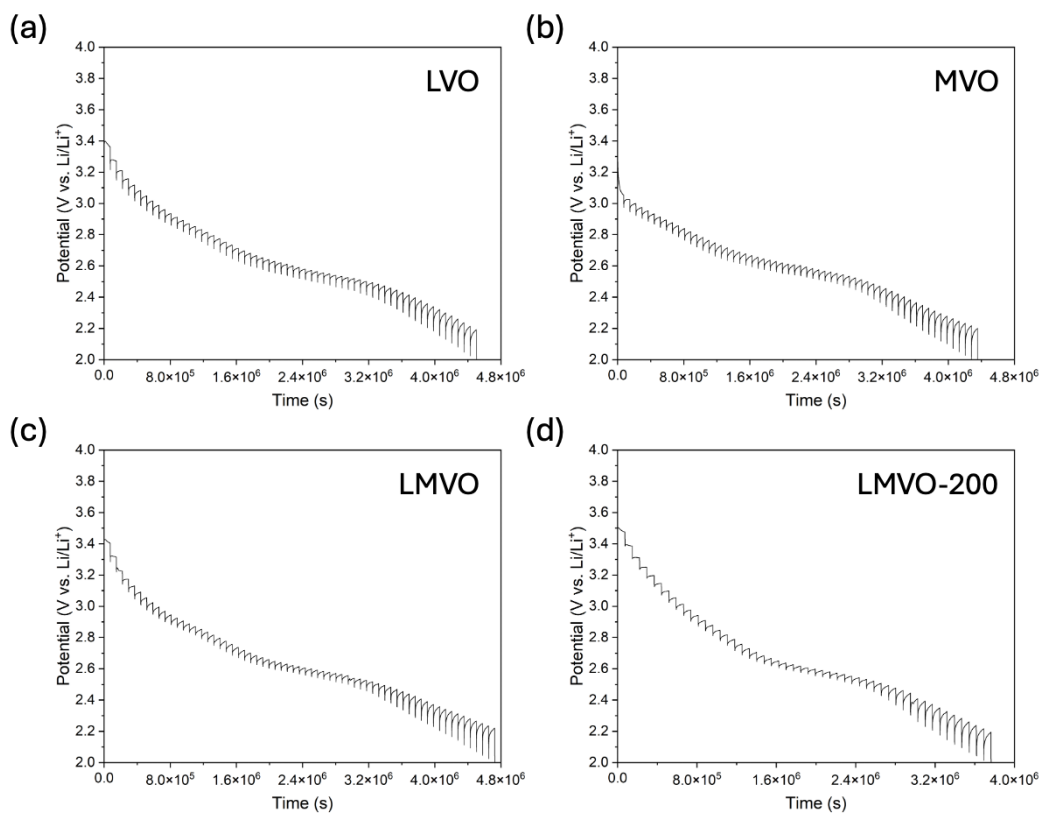

**Figure S5.** GITT profiles of (a) LVO, (b) MVO, (c) LMVO, and (d) LMVO-200 electrodes that were used to develop the diffusion coefficients of Li<sup>+</sup> ions.
